# Supplementary material
Source: PubMed Central journal article supplement (PMC5079759)
Supplement: NIHMS819218-supplement-01.pdf [file NIHMS819218-supplement-01.pdf]

**Supplementary Table (online only).** Cox mortality hazard model

|                                           | Hazard ratio | 95% CI    | P value |
|-------------------------------------------|--------------|-----------|---------|
| AKI                                       | 2.32         | 1.78-3.02 | <.001   |
| New HD                                    | 4.91         | 2.79-8.62 | <.001   |
| ECG or clinical MI postoperatively        | 2.19         | 1.25-3.84 | .006    |
| Preoperative CHF                          | 1.79         | 1.47-2.18 | <.001   |
| Return to operating room                  | 1.67         | 1.20-2.32 | .002    |
| Postoperative vasopressors                | 1.61         | 1.22-2.12 | .001    |
| Unfit for open repair                     | 1.57         | 1.31-1.88 | <.001   |
| New CHF postoperatively                   | 1.40         | 0.94-2.08 | .10     |
| Arterial injury                           | 1.30         | 0.94-1.81 | .11     |
| Unfit for general anesthesia              | 1.29         | 0.91-1.81 | .15     |
| Concomitant procedure                     | 1.26         | 1.05-1.51 | .01     |
| Troponin elevation postoperatively        | 1.26         | 0.77-2.08 | .35     |
| Transfusion postoperatively               | 1.05         | 1.01-1.09 | .007    |
| Age, years                                | 1.04         | 1.03-1.05 | <.001   |
| ICU stay, days                            | 1.02         | 1.00-1.04 | .14     |
| AAA maximum AP diameter, mm               | 1.00         | 1.00-1.00 | .06     |
| Procedure time, minutes                   | 1.00         | 1.00-1.00 | <.001   |
| Crystalloid intraoperatively, mL          | 1.00         | 1.00-1.00 | .003    |
| eGFR $\geq 60$ mL/min/1.73 m <sup>2</sup> | 0.78         | 0.66-0.92 | .004    |
| Concomitant renal stent                   | 0.76         | 0.56-1.04 | .09     |

AAA, Abdominal aortic aneurysm; AKI, acute kidney injury; AP, anteroposterior; CHF, congestive heart failure; CI, confidence interval; ECG, electrocardiography; eGFR, estimated glomerular filtration rate; HD, hemodialysis; ICU, intensive care unit; MI, myocardial infarction.  
Harrell C statistic = 0.749.

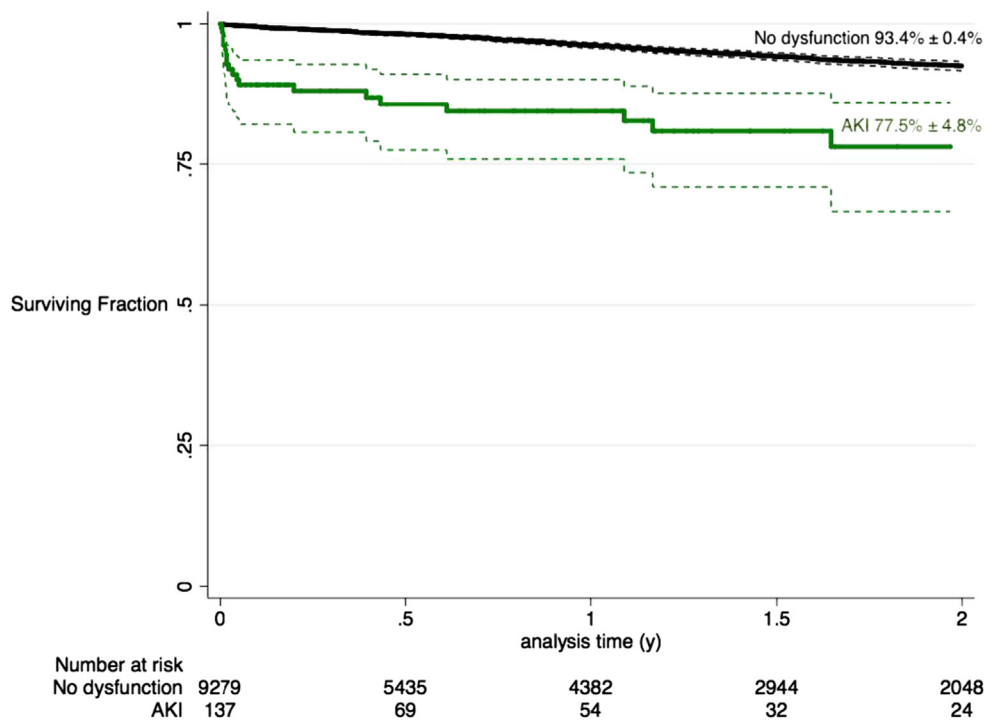

**Supplementary Fig (online only).** Actuarial survival stratified by renal outcome in patients with a preoperative estimated glomerular filtration rate (eGFR)  $\geq 60$  mL/min/1.73 m<sup>2</sup>. Reported as a 2-year estimate  $\pm$  standard error of the mean with 95% confidence interval (CI) bounds. AKI, Acute kidney injury.
